# Supplementary material
Source: ML conference proceedings conference paper supplement (https://proceedings.mlr.press/v84/xie18a.html)
Supplement: Supplementary file [file xie18a-supp.pdf]

## A Proof of Lemma 1

*Proof.* Since each individual function is  $L$ -smooth, we have

$$\sum_{t=0}^{N-1} \|\nabla f_{i_t}(w_t^s) - \nabla f_{i_t}(w_0^s)\| \leq L \sum_{t=0}^{N-1} \|w_t^s - w_0^s\| \quad (19)$$

Next, we bound  $\sum_{t=0}^{N-1} \|w_t^s - w_0^s\|$  using triangle inequality:

$$\begin{aligned} & \sum_{t=0}^{N-1} \|w_t^s - w_0^s\| \\ &= \sum_{t=1}^{N-1} \|w_t^s - w_{t-1}^s + w_{t-1}^s - \dots - w_0^s\| \\ &\leq \sum_{t=1}^{N-1} \sum_{m=0}^{t-1} \|w_{m+1}^s - w_m^s\| \end{aligned} \quad (20)$$

We can bound  $\|w_{t+1}^s - w_t^s\|$  as follows:

$$\begin{aligned} & \|w_{t+1}^s - w_t^s\| \\ &= \eta \|\nabla f_{i_t}(w_t^s) - \nabla f_{i_t}(w_0^s)\| + \frac{1}{N} \sum_{i=1}^N \|\nabla f_i(w_0^s)\| \\ &\leq \eta \left( \|\nabla f_{i_t}(w_t^s) - \nabla f_{i_t}(w_0^s)\| \right. \\ &\quad \left. + \frac{1}{N} \sum_{i=1}^N \|(\nabla f_i(w_0^s) - \nabla f_i(w^*))\| \right) \\ &\leq \eta L (\|w_t^s - w_0^s\| + \|w_0^s - w^*\|) \end{aligned} \quad (21)$$

where the first inequality follows from triangle inequality and uses the fact that  $\nabla F(w^*) = 0$ ; and the second inequality holds because each  $f_i$  is  $L$ -smooth.

Combing (20) and (21), we have

$$\begin{aligned} & \sum_{t=0}^{N-1} \|w_t^s - w_0^s\| \\ &\leq \eta L \sum_{t=1}^{N-1} \sum_{m=0}^{t-1} \left( \|w_m^s - w_0^s\| + \|w_0^s - w^*\| \right) \\ &= \eta L \sum_{m=0}^{N-2} \sum_{t=m+1}^{N-1} \left( \|w_m^s - w_0^s\| + \|w_0^s - w^*\| \right) \\ &\leq \eta L \sum_{m=0}^{N-2} \sum_{t=m+1}^{N-1} \|w_m^s - w_0^s\|^2 + \frac{\eta L N^2}{2} \|w_0^s - w^*\| \\ &\leq \eta L N \sum_{m=0}^{N-1} \|w_m^s - w_0^s\|^2 + \frac{\eta L N^2}{2} \|w_0^s - w^*\| \end{aligned} \quad (22)$$

The first equality of (22) holds because of the fact that

$$\sum_{t=1}^{N-1} \sum_{m=0}^{t-1} h(m, t) \equiv \sum_{m=0}^{N-2} \sum_{t=m+1}^{N-1} h(m, t),$$

where  $h(m, t)$  is an arbitrary function of variables  $m$  and  $t$ . The second inequality holds because  $\sum_{m=0}^{N-2} \sum_{t=m+1}^{N-1} 1 \leq \frac{N^2}{2}$ . Rearrange terms of (22), and use the assumption  $\eta < \frac{1}{NL}$ , we have

$$\sum_{t=0}^{N-1} \|w_t^s - w_0^s\| \leq \frac{\eta L N^2}{2(1 - \eta L N)} \|w_0^s - w^*\|,$$

Therefore, we have

$$\sum_{t=0}^{N-1} \|\nabla f_{i_t}(w_t^s) - \nabla f_{i_t}(w_0^s)\| \leq \frac{\eta L^2 N^2}{2(1 - \eta L N)} \|w_0^s - w^*\|,$$

which is the desired result.  $\square$
